# Supplementary material for: Divergence and adaptive evolution of the gibberellin oxidase genes in plants
Source: PubMed Central journal article supplement (PMC4587577; doi:10.1186/s12862-015-0490-2), 2015-09-29

Figure S1

- Algae
- Physcomitrella patens*
- Selaginella moellendorffii*
- Picea abies*
- Amborella trichopoda*
- Monocot
- Eudicots

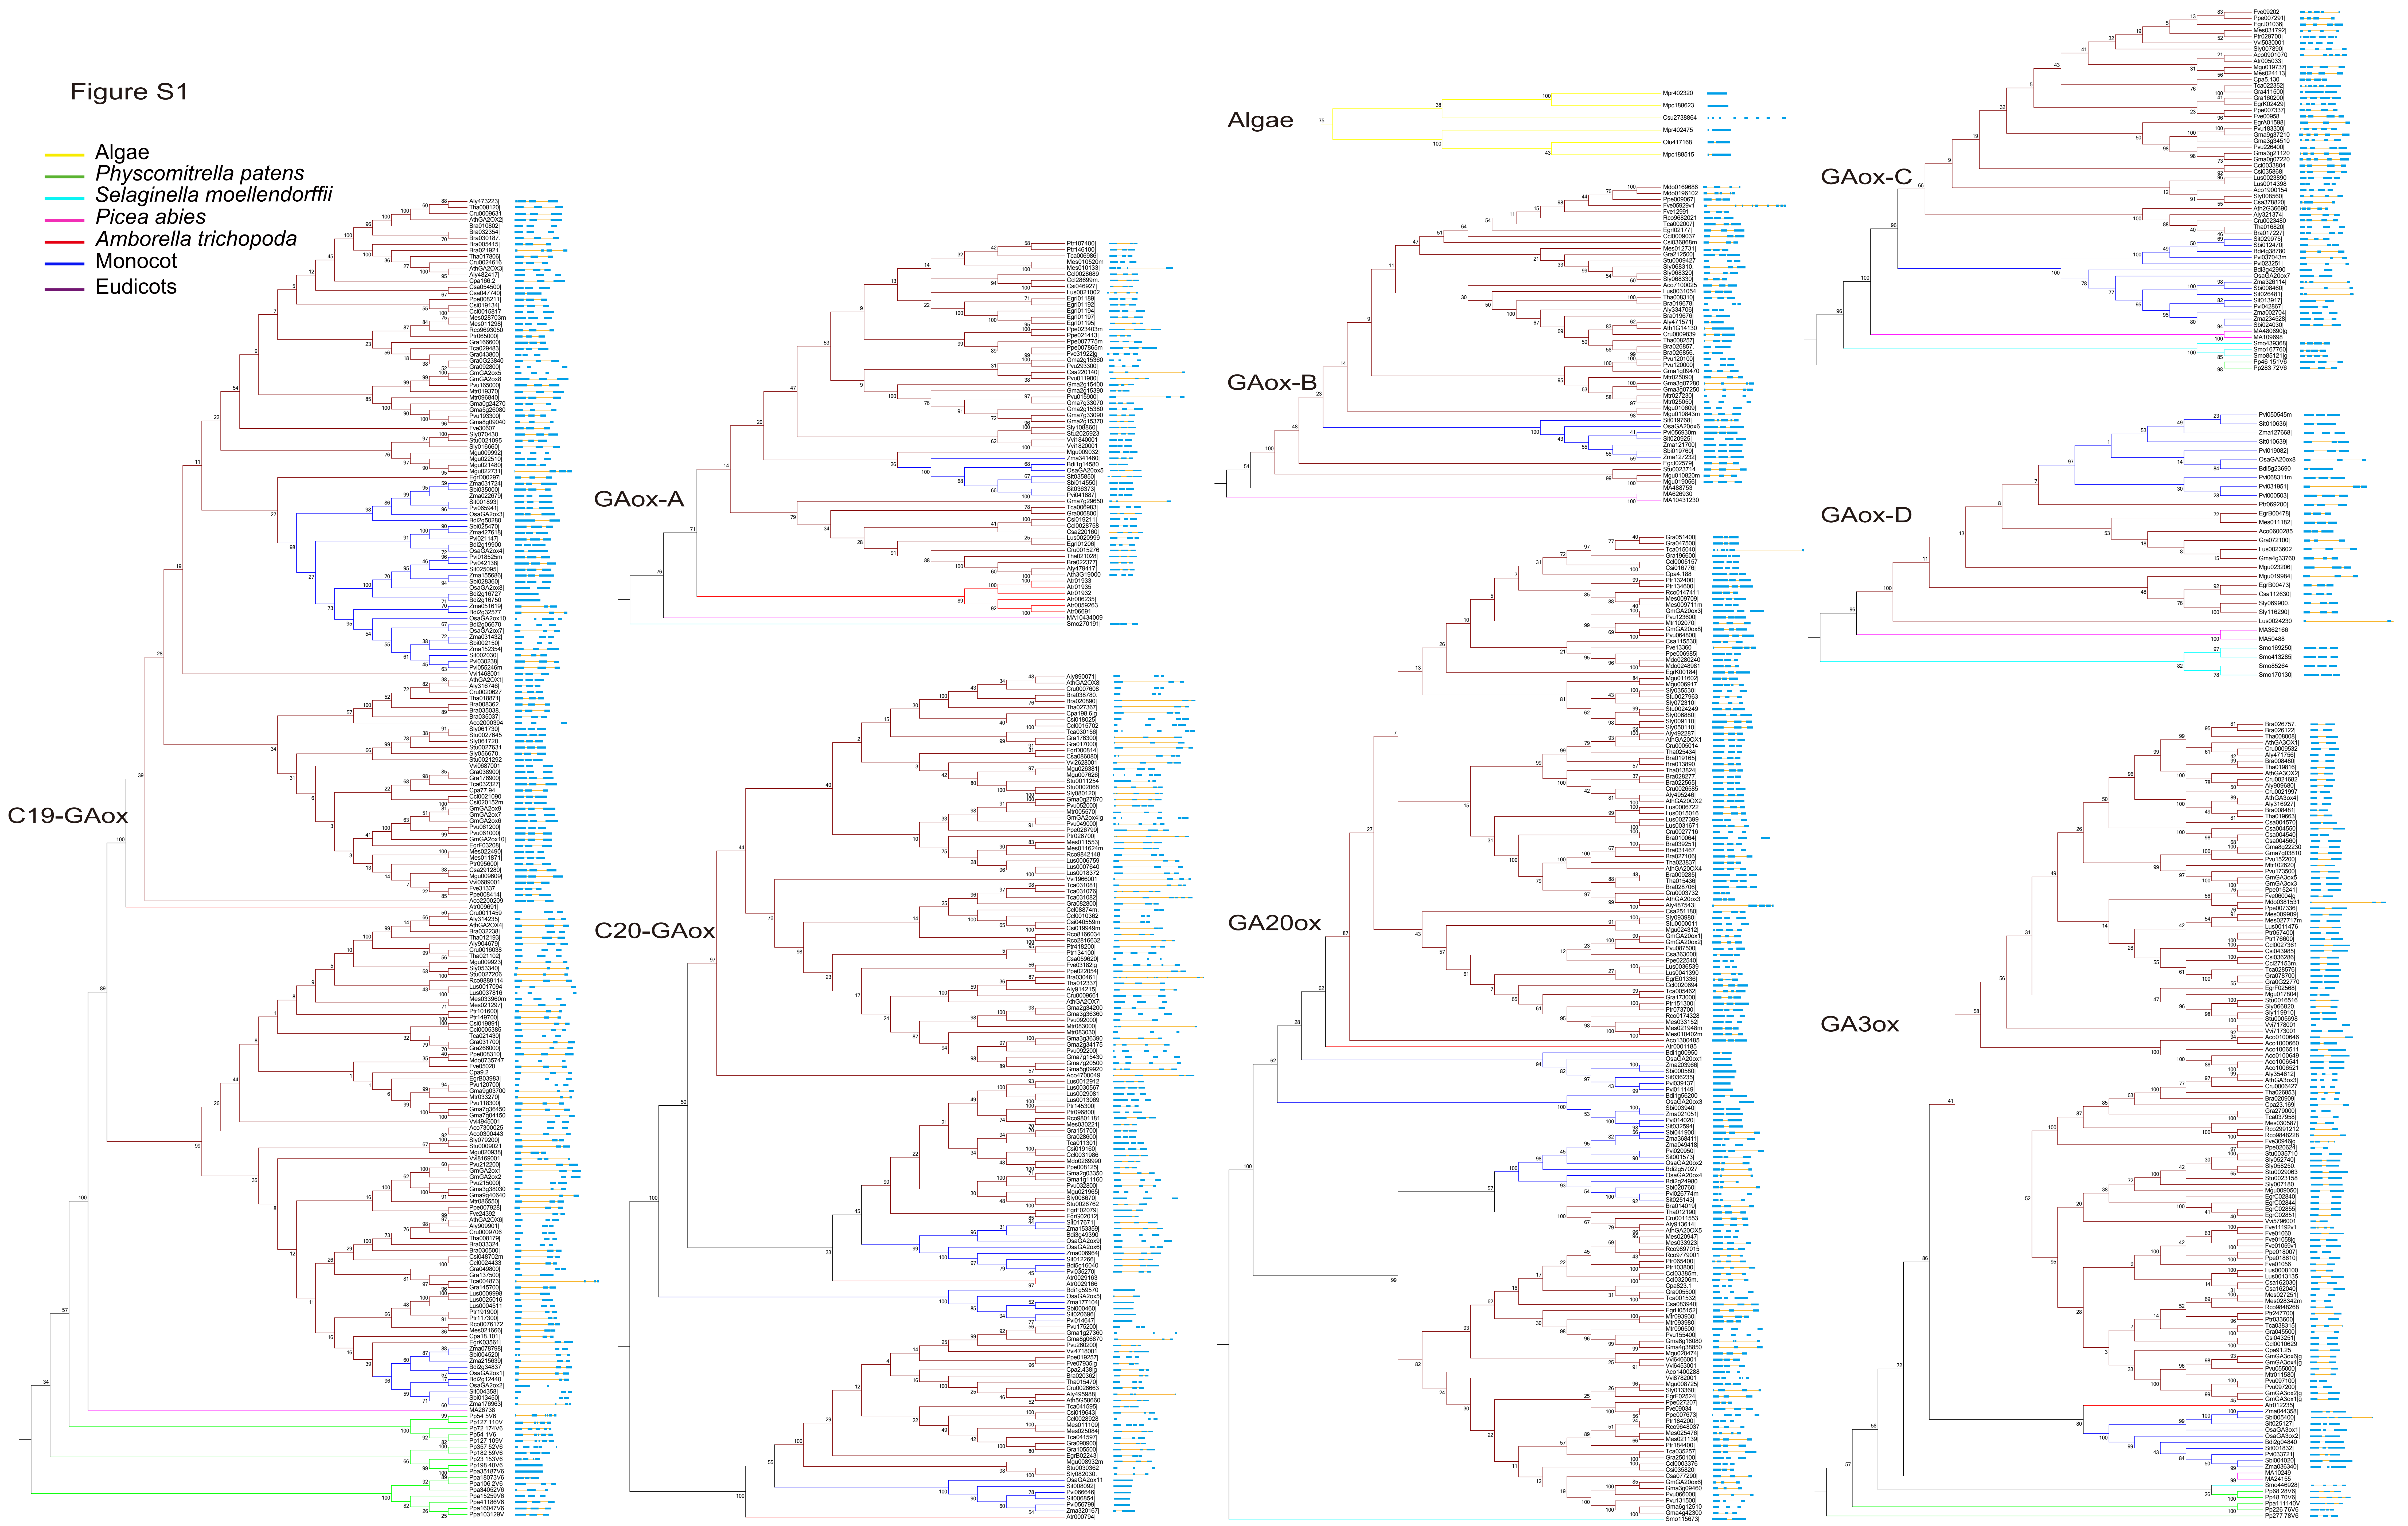

Supplement: 12862_2015_490_MOESM4_ESM.pdf [file 12862_2015_490_MOESM4_ESM.pdf]
